# Supplementary material for: Evolution and Control of Imprinted FWA Genes in the Genus Arabidopsis
Source: PLOS journal article supplement (doi:10.1371/journal.pgen.1000048), 2008-04-03
Supplement: S9 (10.1371/journal.pgen.1000048.s009) [file journal.pgen.1000048.s009]

Supplementary Table S2

Patterns of nucleotide variation in the *FWA* gene within *A. thaliana*

|                      | N <sup>a</sup> | Length  | GC contents | K <sup>b</sup> | $\pi$  | Tajima's D | Direction of mutations in <i>A. thaliana</i> <sup>c</sup> |                    |          |          |
|----------------------|----------------|---------|-------------|----------------|--------|------------|-----------------------------------------------------------|--------------------|----------|----------|
|                      |                |         |             |                |        |            | AT to GC                                                  | GC to AT           | AT to AT | GC to GC |
| Direct repeat region | 96             | 474     | 0.354       | 0.2187         | 0.0079 | -1.873 *   | 7<br>(D=-1.564 *)                                         | 27<br>(D=-1.708 *) | 4        | 3        |
|                      | 12             | 521     | 0.354       | 0.2120         | 0.0082 | -1.007     | 1                                                         | 15                 | 0        | 2        |
| Other regions        |                |         |             |                |        |            |                                                           |                    |          |          |
| All sites            | 12             | 3609    | 0.380       | 0.1212         | 0.0022 | -1.426     | 16                                                        | 16                 | 7        | 2        |
| Silent sites         | 12             | 2029.90 |             | 0.1265         | 0.0030 | -1.331     | 13                                                        | 11                 | 5        | 2        |
| Noncoding region     | 12             | 1551    | 0.313       | 0.1344         | 0.0034 | -1.244     | 11                                                        | 10                 | 3        | 2        |
| Synonymous sites     | 12             | 478.90  |             | 0.1052         | 0.0017 | -1.357     | 2                                                         | 1                  | 2        | 0        |
| Replacement sites    | 12             | 1579.10 |             | 0.1155         | 0.0012 | -1.499     | 3                                                         | 5                  | 2        | 0        |

Ratios of mutation direction between AT to GC and GC to AT significantly differ between repeat region and other region ( $\chi^2 = 6.24$ ,  $p = 0.001$ ).

<sup>a</sup>: Sample size used for the sequence analyses. <sup>b</sup>: Divergence between *A. thaliana* and *A. halleri* ssp. *gemmifera*. <sup>c</sup>: Directions of the mutations were determined parsimoniously using *A. halleri* ssp. *gemmifera* and the other copy of the repeat sequences. When these two sequences differ in variable sites, nucleotide of the other copy of the repeat was used as the ancestral state. Within two classes of them, Tajima's D was calculated as shown in parenthesis.

\*:  $p < 0.05$ .
